# Supplementary material for: Prevalence and Risk Factors of Food Insecurity among Mexican University Students’ Households
Source: MDPI journal article supplement (doi:10.3390/nu13103426), 2021-09-28
Supplement: s1 [file s1]

**Supplementary Table S1.** Prevalence of food insecurity in Mexican university students' households, according to state.

| States of Mexico    | Total<br><i>n</i> | Food Security       | Mild<br>Food Insecurity | Moderate<br>Food Insecurity | Severe<br>Food Insecurity |
|---------------------|-------------------|---------------------|-------------------------|-----------------------------|---------------------------|
| Aguascalientes      | 286               | 76.2 (70.9, 81.0) * | 14.3 (10.5, 18.9)       | 7.0 (4.3, 10.6)             | 2.4 (1.0, 5.0)            |
| Baja California     | 320               | 79.7 (74.9, 84.0)   | 11.3 (8.0, 15.2)        | 4.7 (2.6, 7.6)              | 4.4 (2.4, 7.2)            |
| Baja California Sur | 220               | 73.2 (66.8, 78.9)   | 12.7 (8.6, 17.9)        | 8.6 (5.3, 13.2)             | 5.5 (2.8, 9.3)            |
| Campeche            | 213               | 54.9 (48.0, 61.7)   | 19.2 (14.2, 25.2)       | 13.1 (8.9, 18.4)            | 12.7 (8.5, 17.9)          |
| Coahuila            | 330               | 77.6 (72.7, 82.0)   | 10.9 (7.8, 14.8)        | 8.5 (5.7, 12.0)             | 3.0 (1.5, 5.5)            |
| Colima              | 215               | 60.9 (54.1, 67.5)   | 21.4 (16.1, 27.5)       | 11.6 (7.7, 16.7)            | 6.0 (3.3, 10.1)           |
| Chiapas             | 220               | 66.8 (60.2, 73.0)   | 20.5 (15.3, 26.4)       | 10.9 (7.1, 15.8)            | 1.8 (0.5, 4.6)            |
| Chihuahua           | 379               | 79.2 (74.7, 83.1)   | 9.8 (7.0, 13.2)         | 5.5 (3.5, 8.3)              | 5.5 (3.5, 8.3)            |
| Ciudad de México    | 311               | 78.5 (73.5, 82.9)   | 13.2 (9.6, 17.5)        | 5.5 (3.2, 8.6)              | 2.9 (1.3, 5.4)            |
| Durango             | 233               | 75.1 (69.0, 80.5)   | 13.3 (9.2, 18.4)        | 5.6 (3.0, 9.4)              | 6.0 (3.3, 9.9)            |
| Guanajuato          | 212               | 81.1 (75.2, 86.2)   | 10.8 (7.0, 15.8)        | 6.1 (3.3, 10.3)             | 1.9 (0.5, 4.8)            |
| Guerrero            | 143               | 43.4 (35.1, 51.9)   | 27.3 (20.2, 35.3)       | 20.3 (14.0, 27.8)           | 9.1 (4.9, 15.0)           |
| Hidalgo             | 174               | 58.6 (50.9, 66.0)   | 27.0 (20.6, 34.3)       | 8.0 (4.5, 13.1)             | 6.3 (3.2, 11.0)           |
| Jalisco             | 199               | 85.4 (79.7, 90.0)   | 9.0 (5.4, 13.9)         | 3.0 (1.1, 6.4)              | 2.5 (0.8, 5.8)            |
| Estado de México    | 331               | 67.7 (62.3, 72.7)   | 16.9 (13.0, 21.4)       | 10.3 (7.2, 14.1)            | 5.1 (3.0, 8.1)            |
| Michoacán           | 161               | 74.5 (67.1, 81.1)   | 11.2 (6.8, 17.1)        | 8.7 (4.8, 14.2)             | 5.6 (2.6, 10.3)           |
| Morelia             | 212               | 60.4 (53.5, 67.0)   | 23.1 (17.6, 29.4)       | 9.9 (6.2, 14.7)             | 6.6 (3.7, 10.8)           |
| Nayarit             | 185               | 72.4 (65.4, 78.7)   | 16.8 (11.7, 22.9)       | 6.5 (3.4, 11.1)             | 4.3 (1.9, 8.3)            |
| Nuevo León          | 285               | 79.6 (74.5, 84.2)   | 9.5 (6.3, 13.5)         | 5.6 (3.2, 9.0)              | 5.3 (3.0, 8.5)            |
| Oaxaca              | 148               | 55.4 (47.0, 63.6)   | 25.7 (18.9, 33.5)       | 10.1 (5.8, 16.2)            | 8.8 (4.8, 14.6)           |
| Puebla              | 185               | 68.6 (61.4, 75.3)   | 17.3 (12.1, 23.5)       | 7.0 (3.8, 11.7)             | 7.0 (3.8, 11.7)           |
| Querétaro           | 307               | 71.7 (66.3, 76.6)   | 16.3 (12.3, 20.9)       | 7.5 (4.8, 11.0)             | 4.6 (2.5, 7.5)            |
| Quintana Roo        | 168               | 69.0 (61.5, 75.9)   | 18.5 (12.9, 25.2)       | 8.9 (5.1, 14.3)             | 3.6 (1.3, 7.6)            |
| San Luis Potosí     | 196               | 71.4 (64.6, 77.6)   | 13.8 (9.3, 19.4)        | 7.1 (4.0, 11.7)             | 7.7 (4.3, 12.3)           |
| Sinaloa             | 507               | 64.3 (60.0, 68.5)   | 19.1 (15.8, 22.8)       | 10.8 (8.3, 13.9)            | 5.7 (3.9, 8.1)            |
| Sonora              | 236               | 66.1 (59.7, 72.1)   | 17.4 (12.8, 22.8)       | 8.9 (5.6, 13.3)             | 7.6 (4.6, 11.8)           |
| Tabasco             | 200               | 40.5 (33.6, 47.7)   | 19.0 (13.8, 25.1)       | 21.0 (15.6, 27.3)           | 19.5 (14.2, 25.7)         |
| Tamaulipas          | 229               | 77.3 (71.3, 82.6)   | 11.8 (7.9, 16.7)        | 6.1 (3.4, 10.0)             | 4.8 (2.4, 8.4)            |
| Tlaxcala            | 249               | 65.1 (58.8, 71.0)   | 19.3 (14.6, 24.7)       | 10.4 (6.9, 14.9)            | 5.2 (2.8, 8.8)            |
| Veracruz            | 196               | 49.5 (42.3, 56.7)   | 28.1 (21.9, 34.9)       | 14.3 (9.7, 20.0)            | 8.2 (4.7, 12.9)           |
| Yucatán             | 232               | 67.2 (60.8, 73.2)   | 16.8 (12.2, 22.3)       | 11.6 (7.8, 16.5)            | 4.3 (2.1, 7.8)            |
| Zacatecas           | 189               | 67.2 (60.0, 73.8)   | 18.0 (12.8, 24.2)       | 8.5 (4.9, 13.4)             | 6.3 (3.3, 10.8)           |

\*Percentage (95% CI).

**Supplementary Table S2.** Perception of access to food in Mexican university students' households.

| Questions from Mexican Scale for Food Security (EMSA for its Acronym in Spanish)                                   |                          |
|--------------------------------------------------------------------------------------------------------------------|--------------------------|
|                                                                                                                    | Yes                      |
| In the last three months due to the lack of money or resources, have <b>you or any adult</b> at home...?           |                          |
| 1) Had a low varied diet?                                                                                          | 2012 (26.2) <sup>1</sup> |
| 2) Skipped breakfast, lunch, or dinner?                                                                            | 778 (10.1) <sup>1</sup>  |
| 3) Eaten less than you should?                                                                                     | 1464 (19.1) <sup>1</sup> |
| 4) Ran out of food?                                                                                                | 649 (8.5) <sup>1</sup>   |
| 5) Felt hungry but did not eat?                                                                                    | 840 (27.1) <sup>2</sup>  |
| 6) Eaten only once or stopped eating one day?                                                                      | 551 (17.8) <sup>2</sup>  |
| In the last three months and due to lack of money or resources, has anyone at home <b>under the age of 18</b> ...? |                          |
| 7) Had a low varied diet?                                                                                          | 828 (42.2) <sup>3</sup>  |
| 8) Eaten less than you should?                                                                                     | 552 (28.1) <sup>3</sup>  |
| 9) Received less food during meals?                                                                                | 535 (27.3) <sup>3</sup>  |
| 10) Felt hungry but did not eat?                                                                                   | 230 (11.7) <sup>3</sup>  |
| 11) Went to bed hungry?                                                                                            | 221 (11.3) <sup>3</sup>  |
| 12) Eaten only once or stopped eating one day?                                                                     | 149 (7.6) <sup>3</sup>   |

Question 5 and 6 were only answered by those who answered "yes" in the first questions. <sup>1</sup> *n* = 7671;

<sup>2</sup> *n* = 3103; <sup>3</sup> *n* = 1963.
